# Supplementary material for: Triggering the phase transition of molybdenum di-selenide (MoSe2) 1T@2H by introducing copper (Cu+): experimental insights and DFT analysis for the hydrogen evolution reaction
Source: Royal Society of Chemistry journal article supplement (doi:10.1039/d4se01623h), 2025-01-01
Supplement: d4se01623h1.pdf [file d4se01623h1.pdf]

## Supporting information

### Triggering the phase transition of Molybdenum Di-Selenide (MoSe<sub>2</sub>) 1T@2H by introducing Copper (Cu<sup>+</sup>): Experimental Insights and DFT Analysis for hydrogen evolution reaction

*Gautham Kumar G, P Balaji Bhargav\*, Balaji C, D Shobana Priyanka*

Department of Physics, Sri Sivasubramaniya Nadar College of Engineering, Kalavakkam, 603110, India

Corresponding author: [balajibhargavp@ssn.edu.in](mailto:balajibhargavp@ssn.edu.in) (Dr P Balaji Bhargav)

#### 1. Material and reagents

Selenium powder (Se) and Cupric chloride CuCl<sub>2</sub>.2H<sub>2</sub>O were purchased from Sigma Aldrich and sodium molybdate dihydrate (Na<sub>2</sub>MoO<sub>4</sub>. 2H<sub>2</sub>O), and hydrazine hydrate solution (N<sub>2</sub>H<sub>4</sub>. H<sub>2</sub>O) were purchased from Qualigens Fine Chemicals Ltd, sulphuric acid (H<sub>2</sub>SO<sub>4</sub>; assay 97%), The above chemicals were of analytical grade and used without any further purification.

#### 1.1 Material characterizations

The crystallinity of powdered Pristine MoSe<sub>2</sub> and 3% & 5% Cu-MoSe<sub>2</sub> samples was examined utilizing a PANalytical EMPYREAN X-ray system with a monochromatic CuK $\alpha$  ( $\lambda = 1.5406 \text{ \AA}$ ) radiation source. X-ray photoelectron spectroscopy (XPS) was conducted utilizing the PHI - VERSAPROBE III from Japan to ascertain the elemental makeup and their chemical states. High-resolution scanning electron microscopy (HRSEM) (Thermo-Fisher Scientific, USA) was used to document the morphology of the synthesized Pristine MoSe<sub>2</sub>, 3% Cu-MoSe<sub>2</sub>@CC, and 5% Cu-MoSe<sub>2</sub>@CC samples. The Energy Dispersive X-ray Analysis (EDX) (Oxford instruments) was used to do elemental analysis accompanied by colour mapping.

#### 2. X-ray diffraction patterns (XRD)

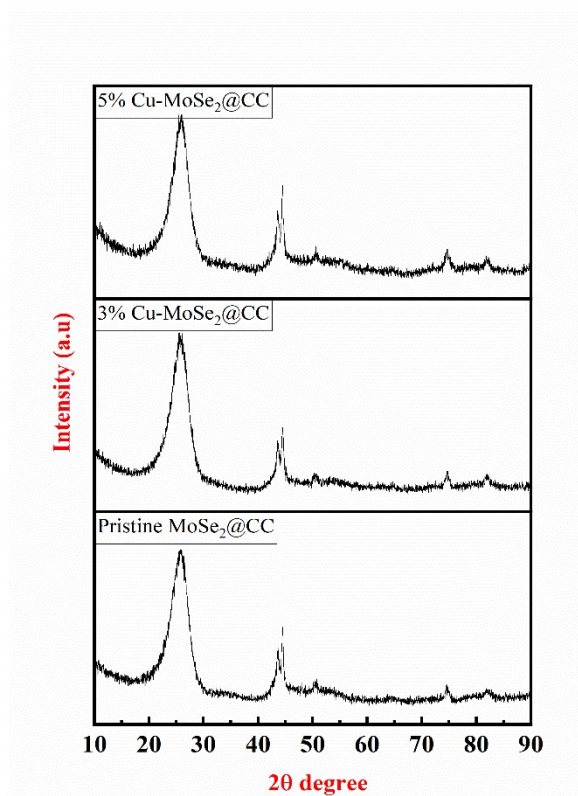

*Figure S1- X-ray diffraction patterns of Pristine MoSe<sub>2</sub>@CC, 3% Cu-MoSe<sub>2</sub>@CC, and 5% Cu-MoSe<sub>2</sub>@CC catalyst coated on Carbon cloth*

### 3. X-ray photoelectron spectroscopy (XPS)

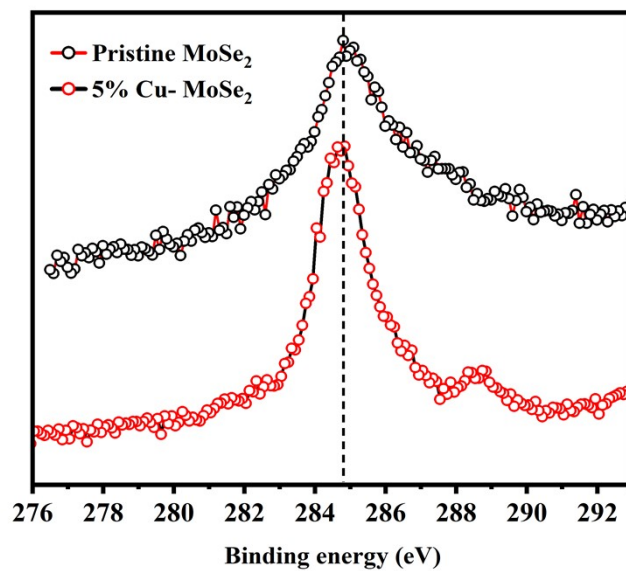

Figure S2 -high resolution XPS spectra of Carbon C1s - samples Pristine MoSe<sub>2</sub> and 5%Cu-MoSe<sub>2</sub>

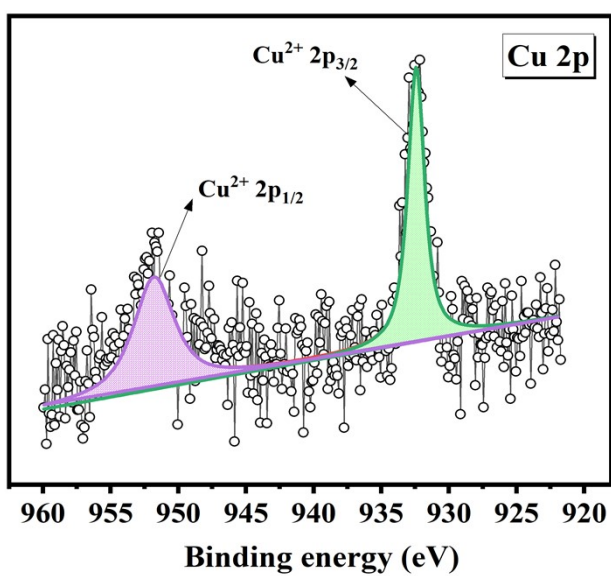

Figure S3- Core-level XPS spectra of Cu-2p

#### 4. Electrochemical activity

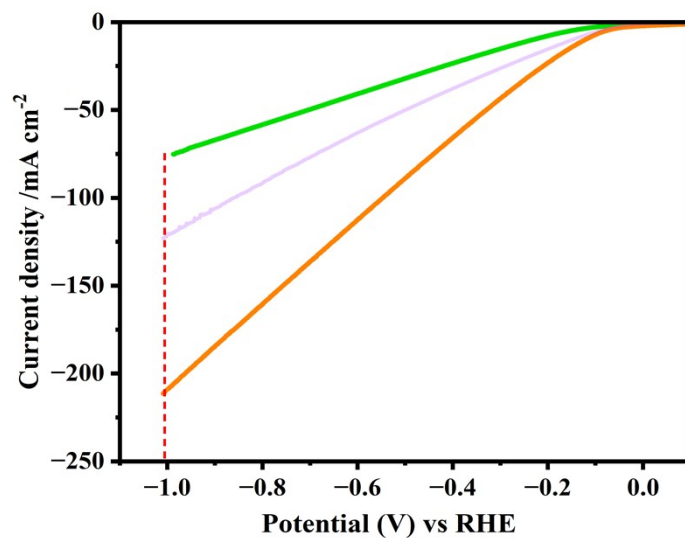

*Figure S4-Linear polarization curves indicating the increased current density of adding Cu on MoSe<sub>2</sub>*

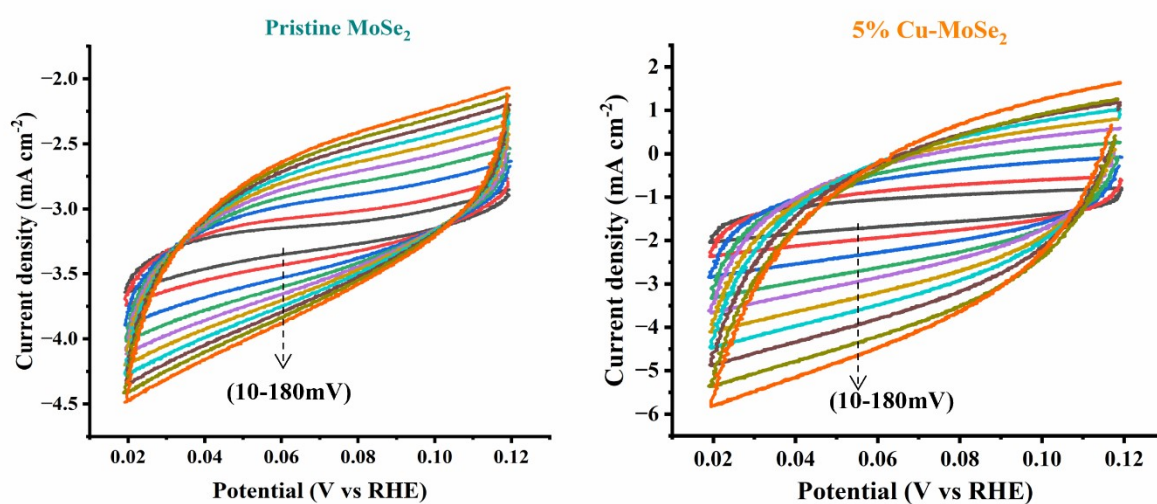

*Figure S5 -CV curves between 0.02 and 0.12 of the Pristine MoSe<sub>2</sub> & 5%Cu-MoSe<sub>2</sub> samples with at different scan rates*

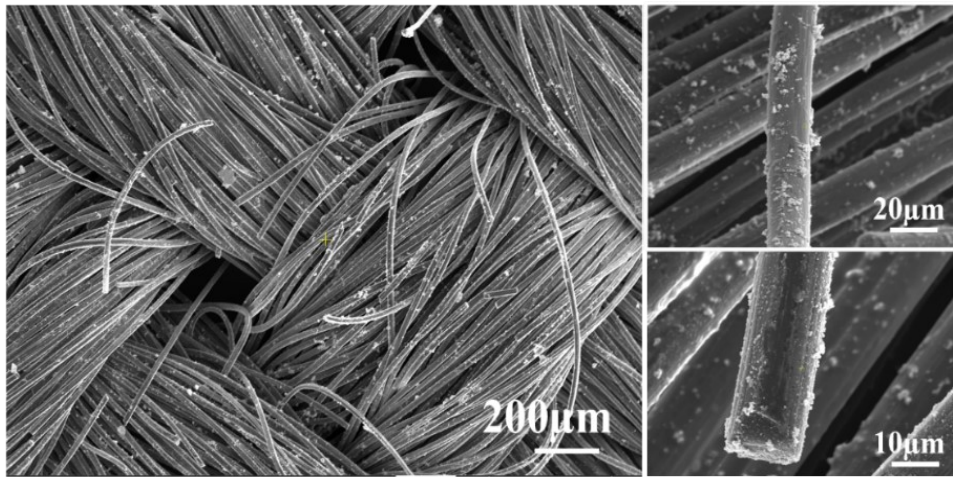

*Figure S6 - SEM images with different magnification of after stability of 80hrs*

## 5. DFT

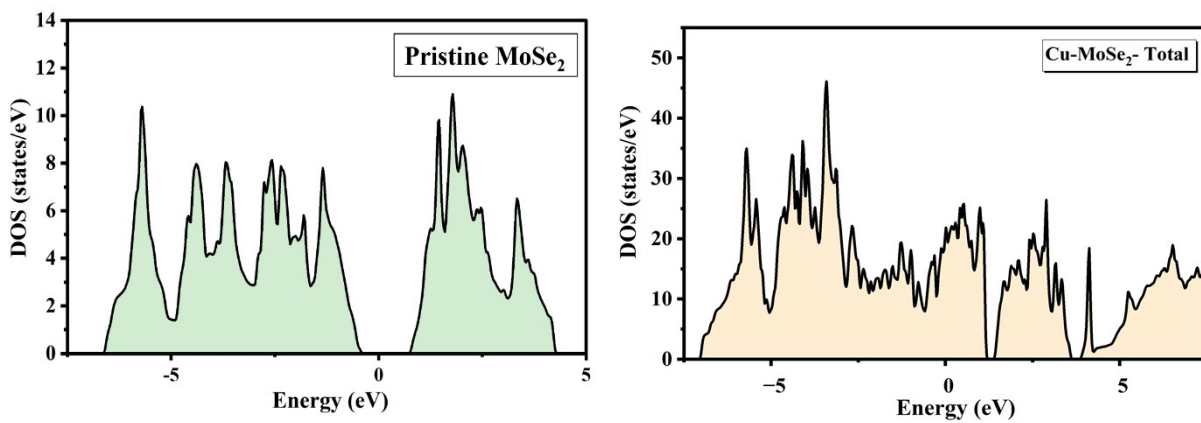

*Figure S7 The total density of states as a function of energy for Pristine MoSe<sub>2</sub>(2H) and Cu-MoSe<sub>2</sub>(1T)*
